# Supplementary material for: Well-defined coinage metal transfer agents for the synthesis of NHC-based nickel, rhodium and palladium macrocycles
Source: PubMed Central journal article supplement (PMC5783018; doi:10.1039/c6dt01263a), 2016-05-09
Supplement: DT-045-C6DT01263A-s001.pdf [file DT-045-C6DT01263A-s001.pdf]

*Supporting material:*

**Well-defined coinage metal transfer agents for the synthesis of NHC-based nickel,  
rhodium and palladium macrocycles**

Rhiann E. Andrew, Caroline M. Storey and Adrian B. Chaplin\*

*Department of Chemistry, University of Warwick, Gibbet Hill Road, Coventry CV4 7AL, UK.*

E-mail: [a.b.chaplin@warwick.ac.uk](mailto:a.b.chaplin@warwick.ac.uk)

**Contents:**

|                                                                                               |            |
|-----------------------------------------------------------------------------------------------|------------|
| <b>1. Selected NMR spectra of 2, 3, 4 and 7</b>                                               | <b>S2</b>  |
| 1.1. [Ag( <b>1</b> )] <sub>2</sub> [BAr <sup>F</sup> <sub>4</sub> ] <sub>2</sub> ( <b>2</b> ) | <b>S2</b>  |
| 1.2. [Cu( <b>1</b> )] <sub>2</sub> [Cu <sub>2</sub> Br <sub>4</sub> ] ( <b>3</b> )            | <b>S4</b>  |
| 1.3. [Cu( <b>1</b> )][BAr <sup>F</sup> <sub>4</sub> ] ( <b>4</b> )                            | <b>S5</b>  |
| 1.4. [Ni( <b>1</b> )][BAr <sup>F</sup> <sub>4</sub> ] ( <b>7</b> )                            | <b>S6</b>  |
| <b>2. NMR-scale Transmetallation Reactions of 2 and 4</b>                                     | <b>S7</b>  |
| 2.1. Reaction of <b>2</b> with [PdCl <sub>2</sub> (NCMe) <sub>2</sub> ] to give <b>5</b>      | <b>S7</b>  |
| 2.2. Reaction of <b>4</b> with [PdCl <sub>2</sub> (NCMe) <sub>2</sub> ] to give <b>5</b>      | <b>S7</b>  |
| 2.3. Reaction of <b>2</b> with [Rh(CO) <sub>2</sub> Cl] <sub>2</sub> to give <b>6</b>         | <b>S8</b>  |
| 2.4. Reaction of <b>4</b> with [Rh(CO) <sub>2</sub> Cl] <sub>2</sub> to give <b>6</b>         | <b>S8</b>  |
| 2.5. Reactions of <b>2</b> with [NiCl <sub>2</sub> (glyme)] to give <b>7</b>                  | <b>S9</b>  |
| 2.6. Reactions of <b>4</b> with [NiCl <sub>2</sub> (glyme)] to give <b>7</b>                  | <b>S10</b> |
| <b>3. High Resolution Mass Spectra of 2, 3, 4 and 7</b>                                       | <b>S11</b> |

# 1. Selected NMR spectra of 2, 3, 4 and 7

## 1.1. [Ag(1)]<sub>2</sub>[BAR<sup>F</sup><sub>4</sub>]<sub>2</sub> (2)

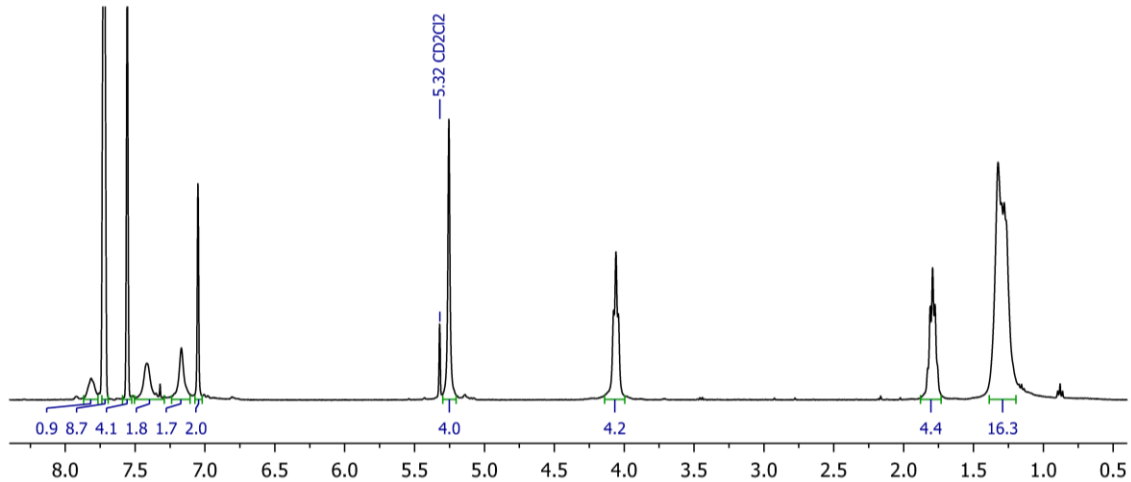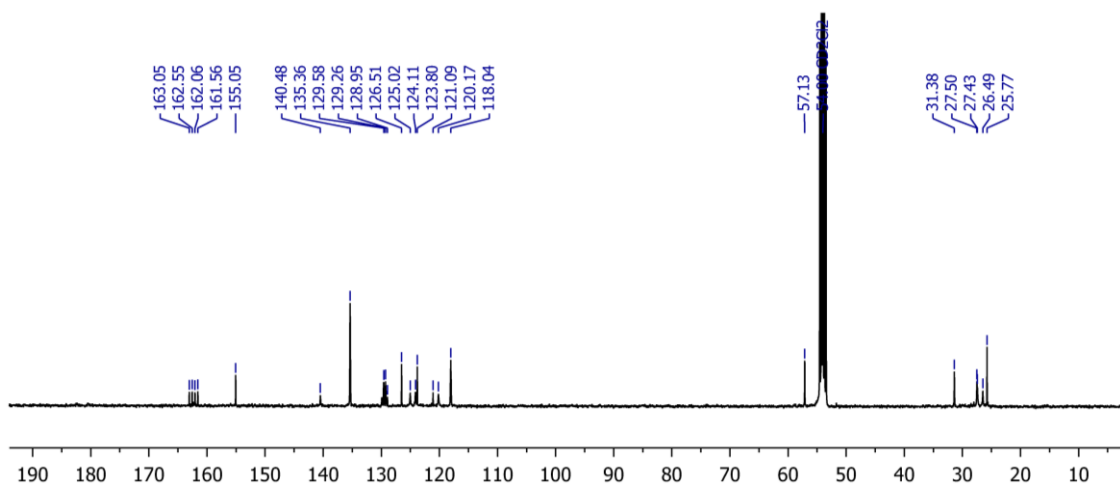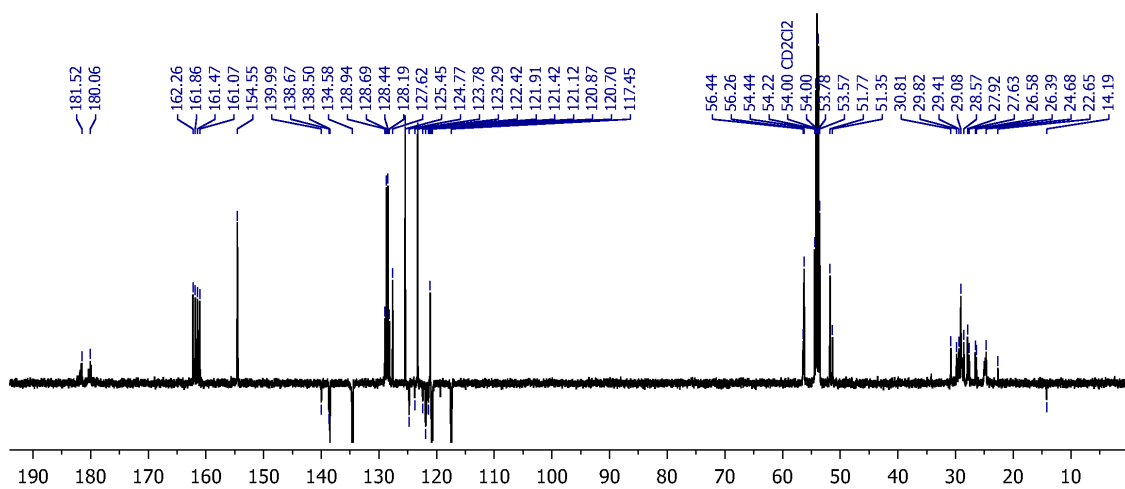

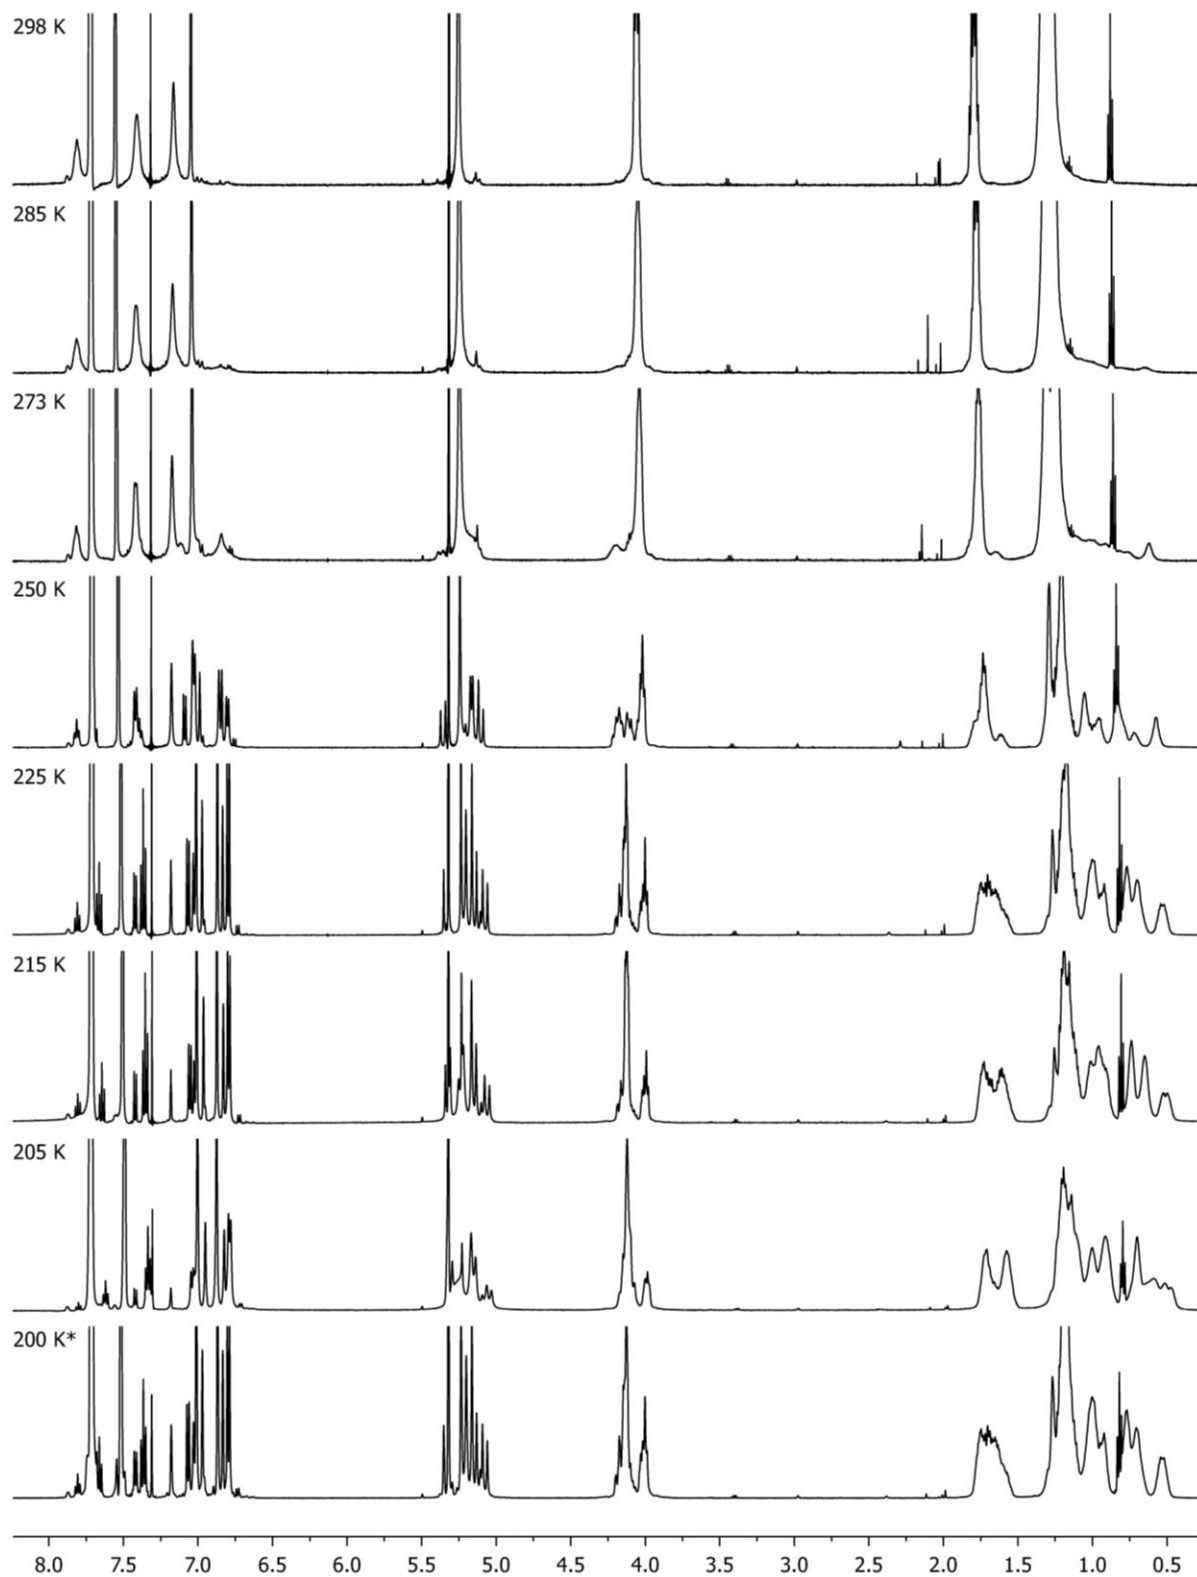

**Figure S4:** Variable temperature  $^1\text{H}$  NMR spectra of **2** ( $\text{CD}_2\text{Cl}_2$ , 500 MHz, 298-200 K). \* = recorded independently from others

1.2. [Cu(1)]<sub>2</sub>[Cu<sub>2</sub>Br<sub>4</sub>] (3)

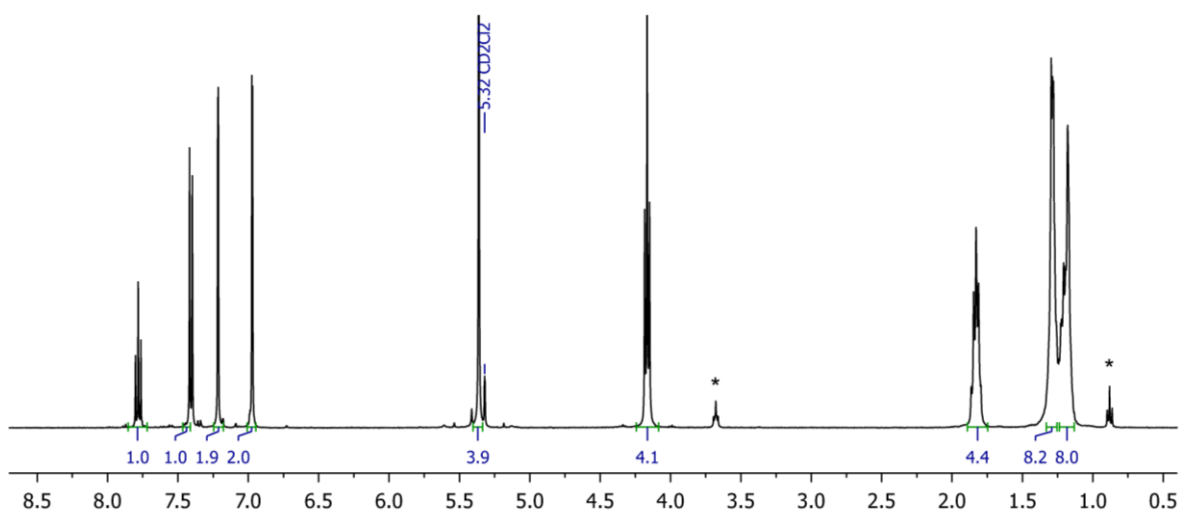

Figure S5: <sup>1</sup>H NMR spectrum of **3** (CD<sub>2</sub>Cl<sub>2</sub>, 400 MHz). \* = THF, pentane.

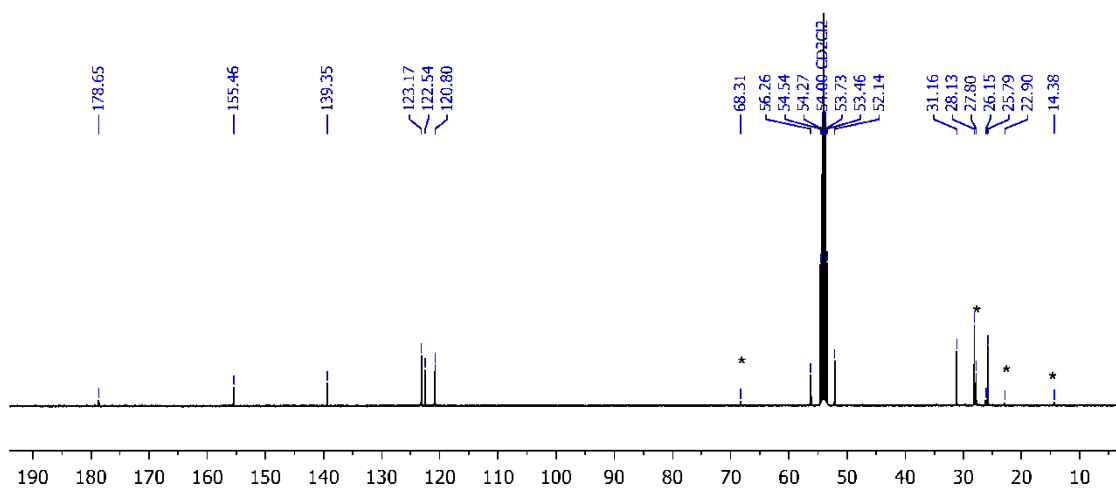

Figure S6: <sup>13</sup>C{<sup>1</sup>H} NMR spectrum of **3** (CD<sub>2</sub>Cl<sub>2</sub>, 101 MHz). \* = THF, pentane.

1.3. [Cu(1)][BAR<sup>F</sup><sub>4</sub>] (4)

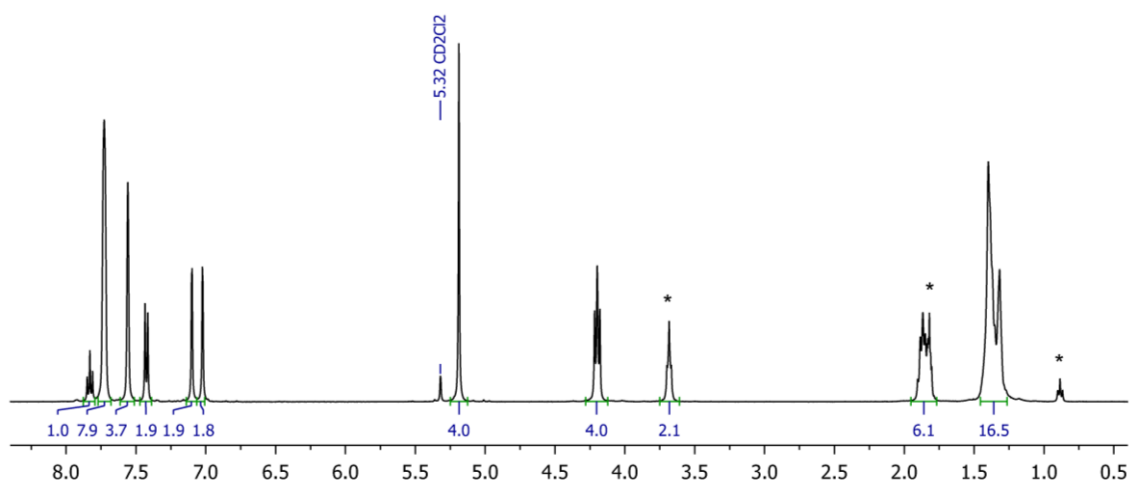

Figure S7: <sup>1</sup>H NMR spectrum of 4 (CD<sub>2</sub>Cl<sub>2</sub>, 400 MHz). \* = THF, pentane.

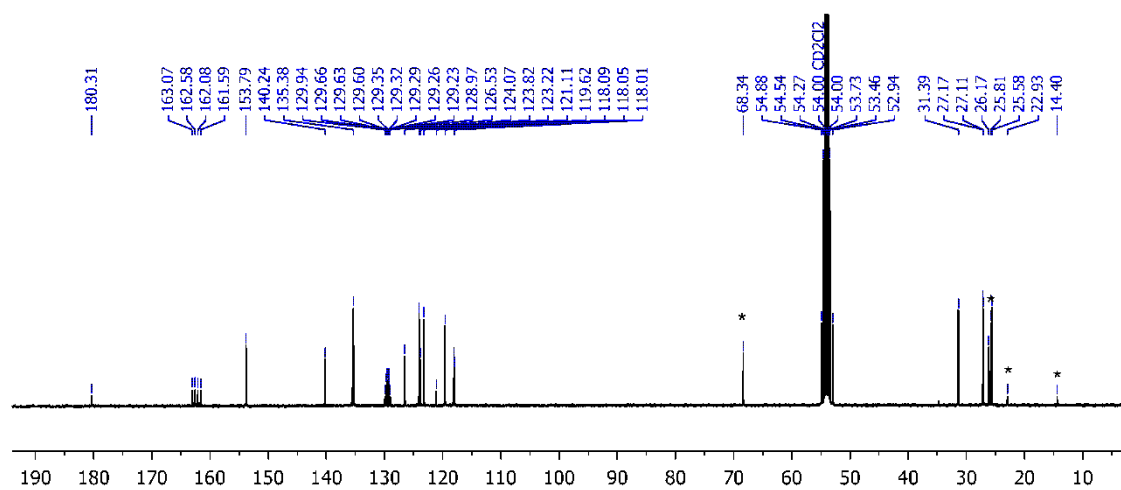

Figure S8: <sup>13</sup>C{<sup>1</sup>H} NMR spectrum of 4 (CD<sub>2</sub>Cl<sub>2</sub>, 101 MHz). \* = THF, pentane.

1.4. [Ni(**1**)][BAr<sup>F</sup><sub>4</sub>] (**7**)

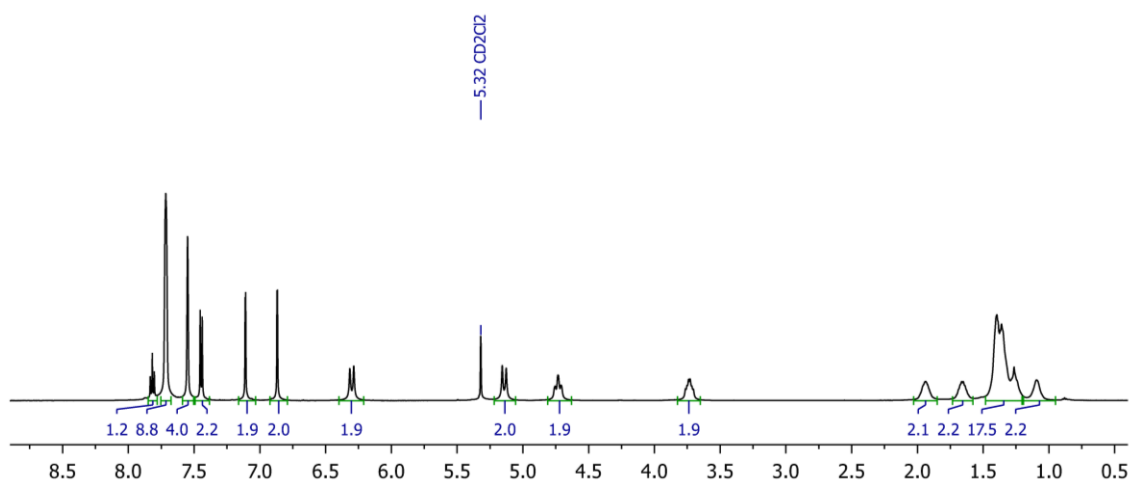

Figure S9: <sup>1</sup>H NMR spectrum of **7** (CD<sub>2</sub>Cl<sub>2</sub>, 500 MHz).

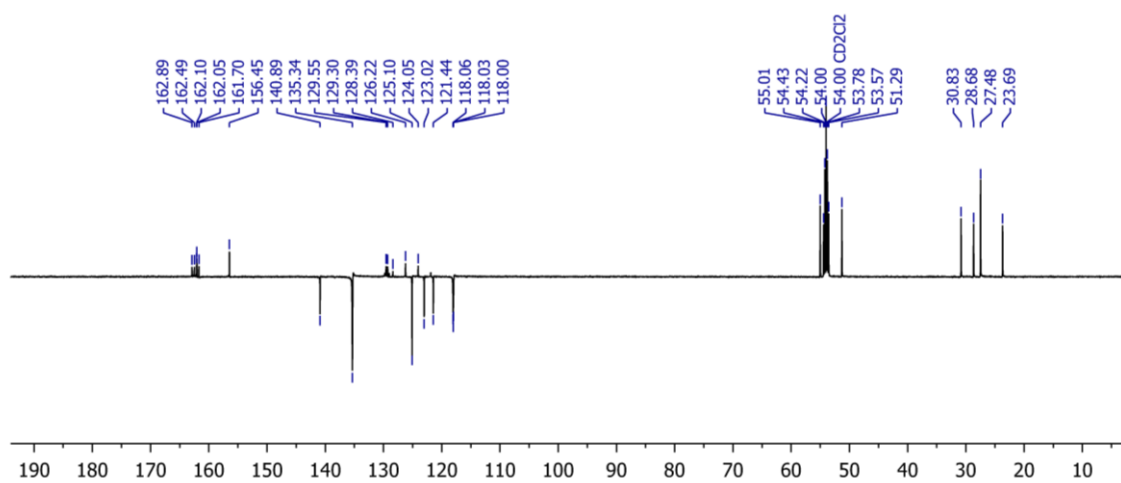

Figure S10: <sup>13</sup>C{<sup>1</sup>H} APT NMR spectrum of **7** (CD<sub>2</sub>Cl<sub>2</sub>, 126 MHz).

## 2. NMR-scale Transmetalation Reactions of **2** and **4**

### 2.1. Reaction of **2** with $[\text{PdCl}_2(\text{NMe}_2)_2]$ to give **5**

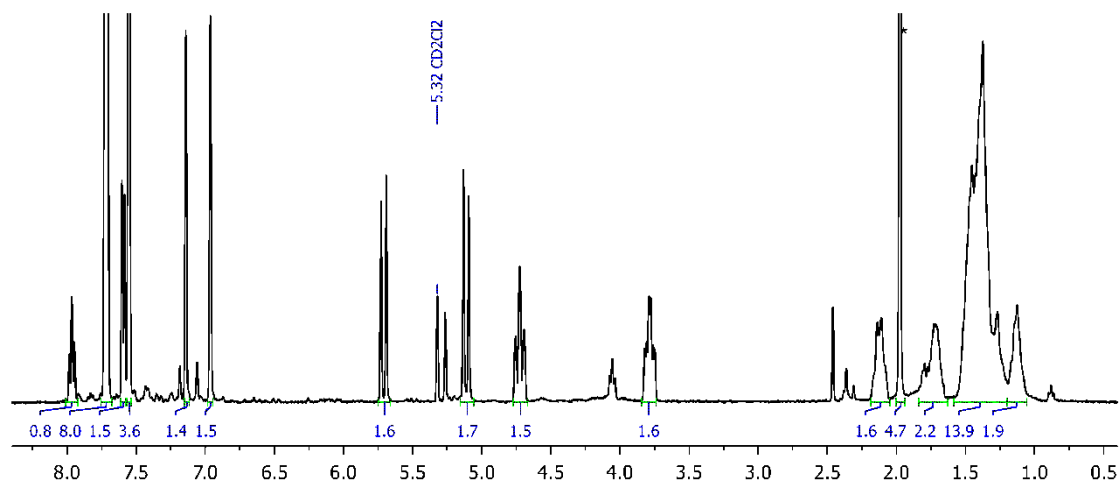

**Figure S11:**  $^1\text{H}$  NMR spectrum of *in situ* reaction of **2** and  $[\text{PdCl}_2(\text{NMe}_2)_2]$  at  $20^\circ\text{C}$  after 0.5 h ( $\text{CD}_2\text{Cl}_2$ , 400 MHz). \* = MeCN.

### 2.2. Reaction of **4** with $[\text{PdCl}_2(\text{NMe}_2)_2]$ to give **5**

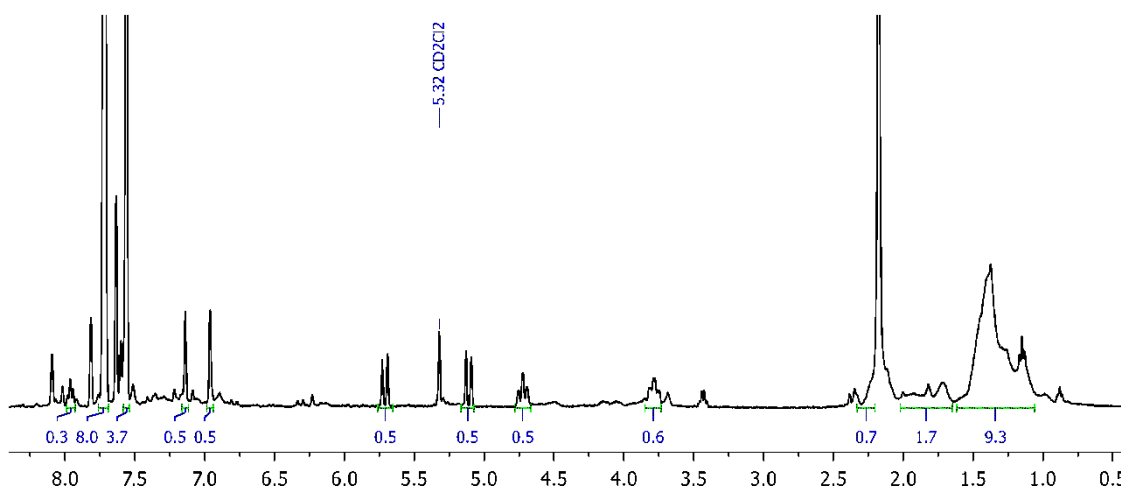

**Figure S12:**  $^1\text{H}$  NMR spectrum of *in situ* reaction of **4** and  $[\text{PdCl}_2(\text{MeCN})_2]$  at  $20^\circ\text{C}$  after 0.5 h ( $\text{CD}_2\text{Cl}_2$ , 400 MHz). \* = MeCN.

2.3. Reaction of **2** with  $[\text{Rh}(\text{CO})_2\text{Cl}]_2$  to give **6**

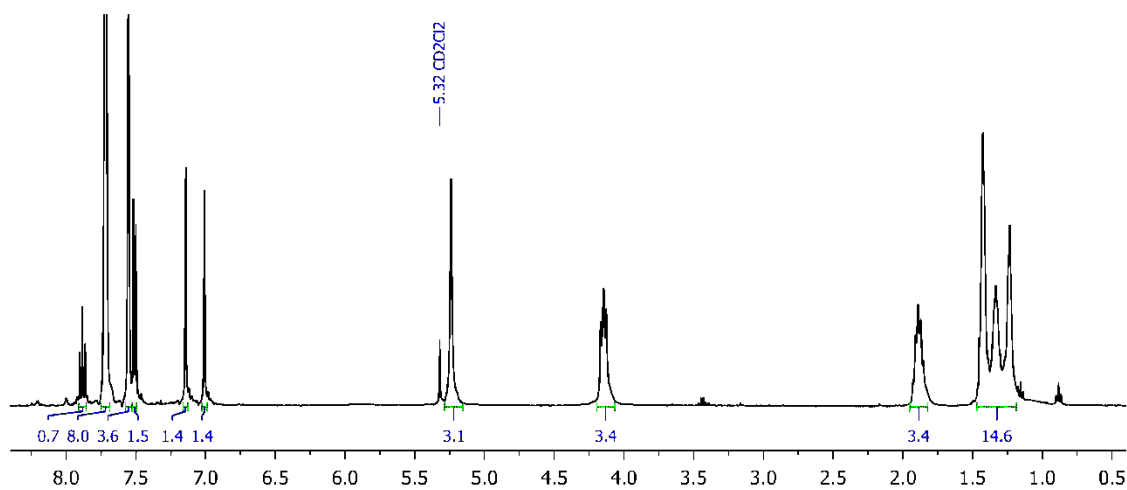

Figure S13:  $^1\text{H}$  NMR spectrum of *in situ* reaction of **2** and  $[\text{Rh}(\text{CO})_2\text{Cl}]_2$  at 20°C after 0.5 h ( $\text{CD}_2\text{Cl}_2$ , 400 MHz).

2.4. Reaction of **4** with  $[\text{Rh}(\text{CO})_2\text{Cl}]_2$  to give **6**

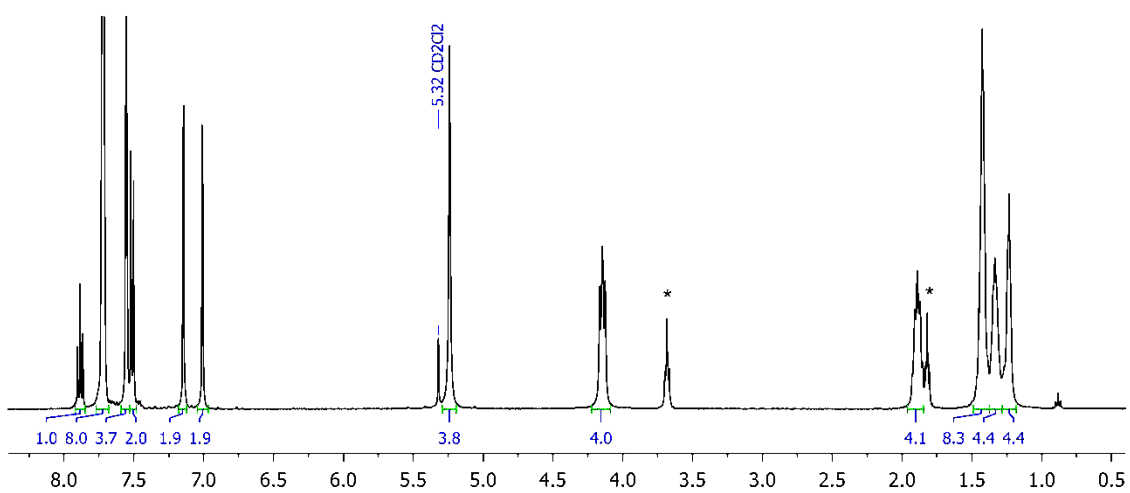

Figure S14:  $^1\text{H}$  NMR spectrum of *in situ* reaction of **4** and  $[\text{Rh}(\text{CO})_2\text{Cl}]_2$  at 20°C after 0.5 h ( $\text{CD}_2\text{Cl}_2$ , 400 MHz). \* = THF



2.5. Reactions of **2** with  $[\text{NiCl}_2(\text{glyme})]$  to give **7**

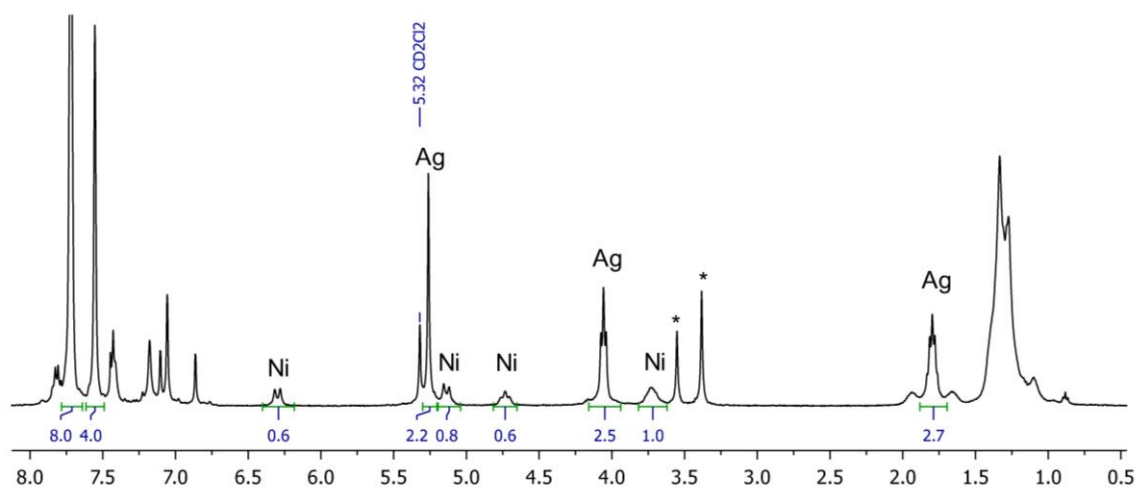

Figure S15:  $^1\text{H}$  NMR spectrum of *in situ* reaction of **2** and  $[\text{NiCl}_2(\text{glyme})]$  at  $20^\circ\text{C}$  after 20 h ( $\text{CD}_2\text{Cl}_2$ , 400 MHz). \* = glyme.

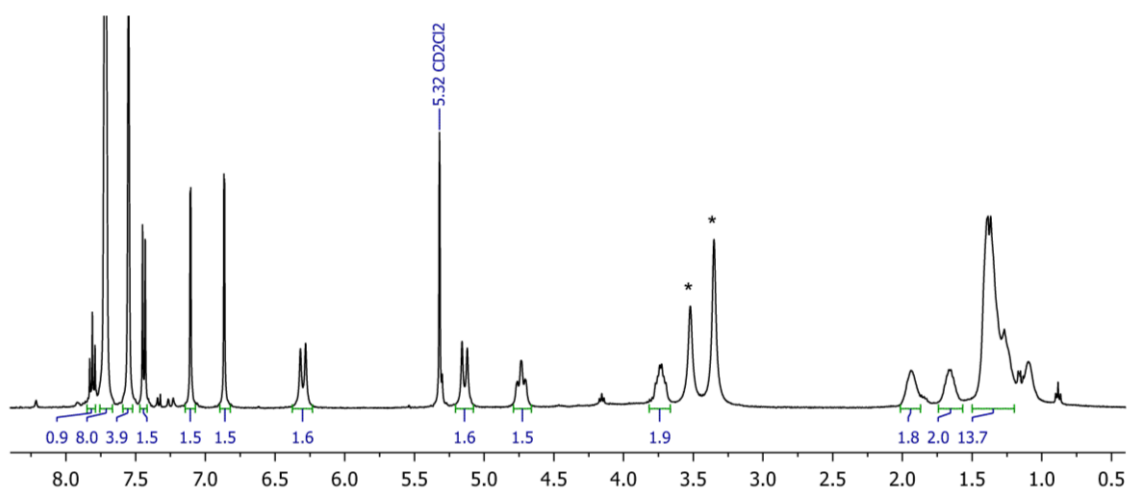

Figure S16:  $^1\text{H}$  NMR spectrum of *in situ* reaction of **2** and  $[\text{NiCl}_2(\text{glyme})]$  at  $40^\circ\text{C}$  after 20 h ( $\text{CD}_2\text{Cl}_2$ , 400 MHz). \* = glyme.

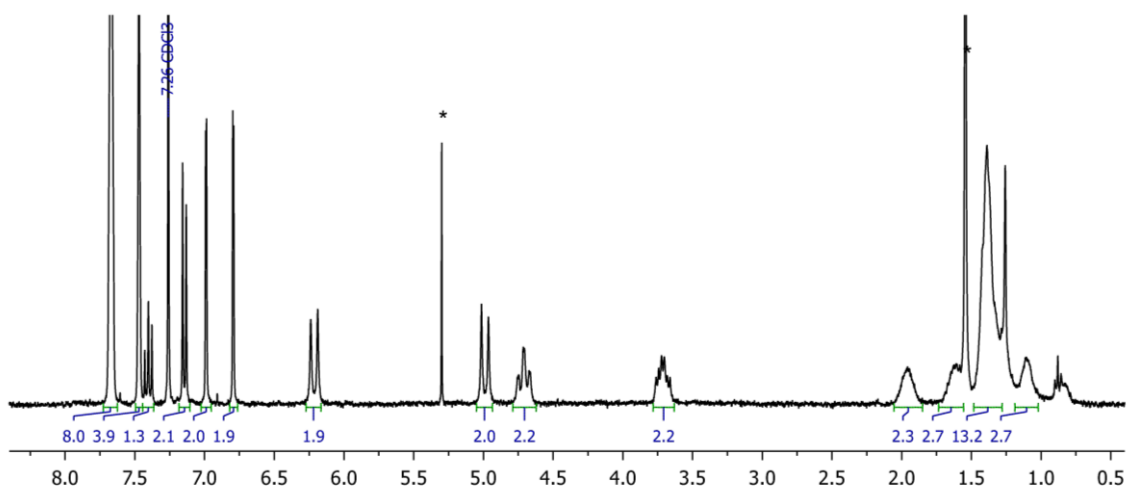

Figure S17:  $^1\text{H}$  NMR spectrum of isolated **7** from **2** ( $\text{CDCl}_3$ , 300 MHz). \* =  $\text{CH}_2\text{Cl}_2$ ,  $\text{H}_2\text{O}$

## 2.6. Reactions of **4** with $[\text{NiCl}_2(\text{glyme})]$ to give **7**

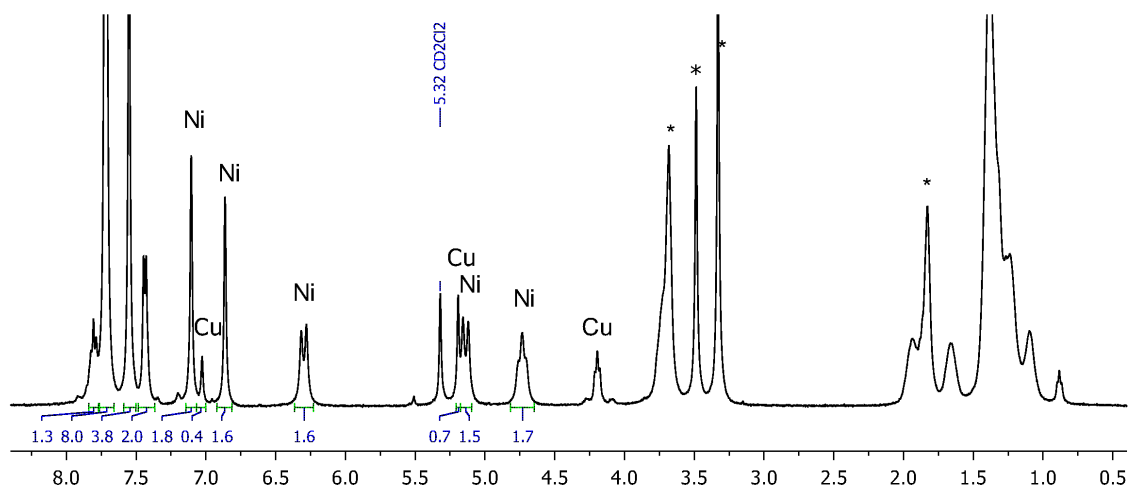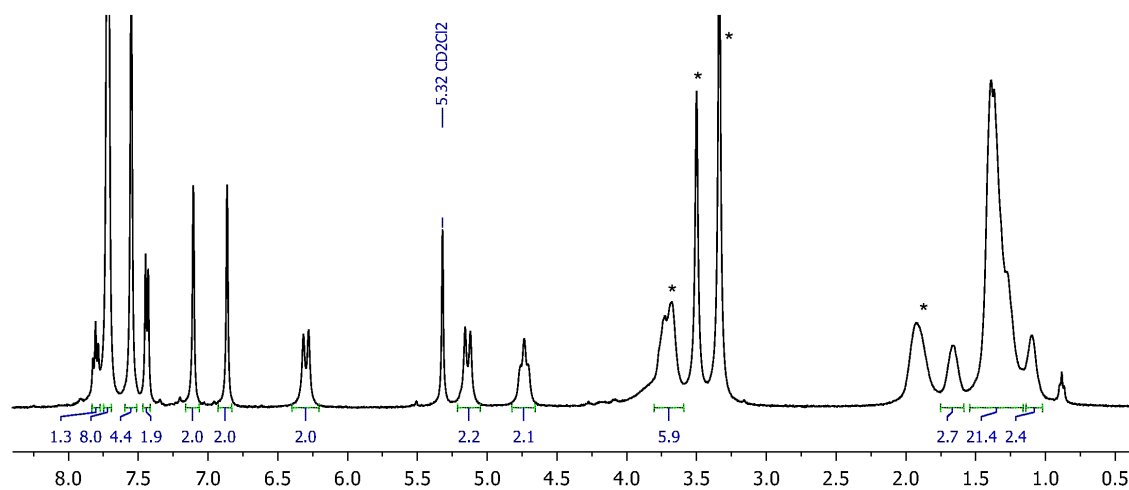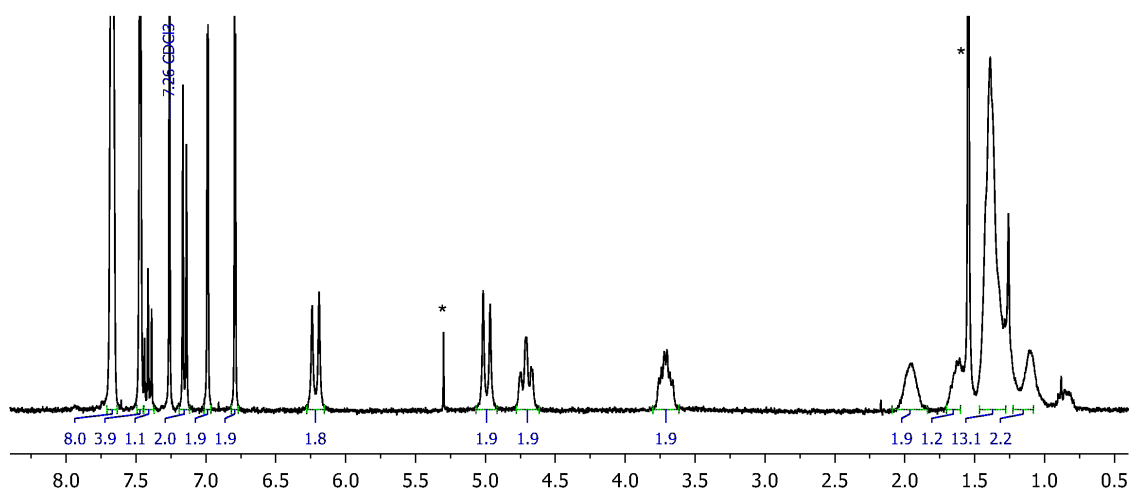

### 3. High Resolution Mass Spectra of 2, 3, 4 and 7

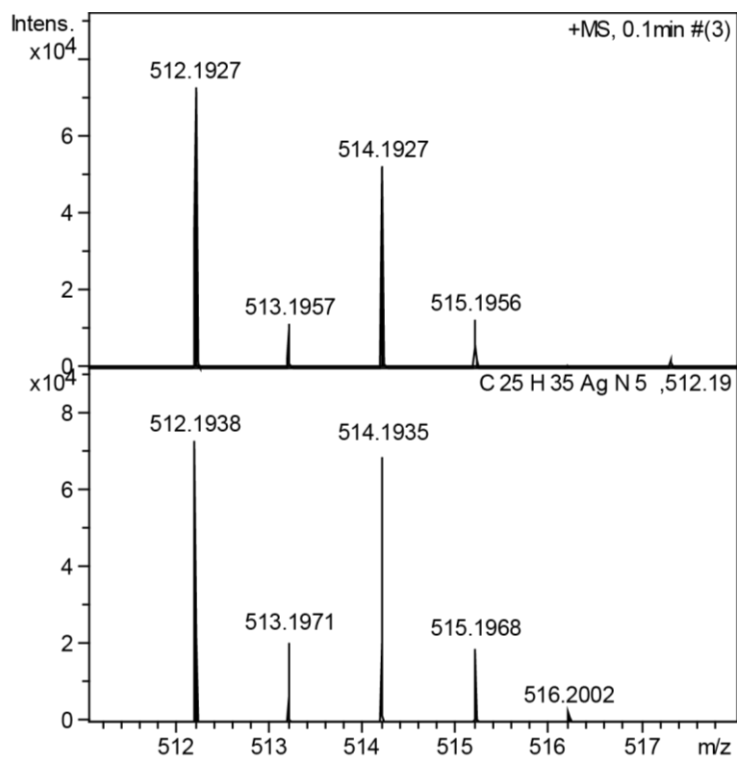

Figure S21: ESI-MS spectrum of 2.

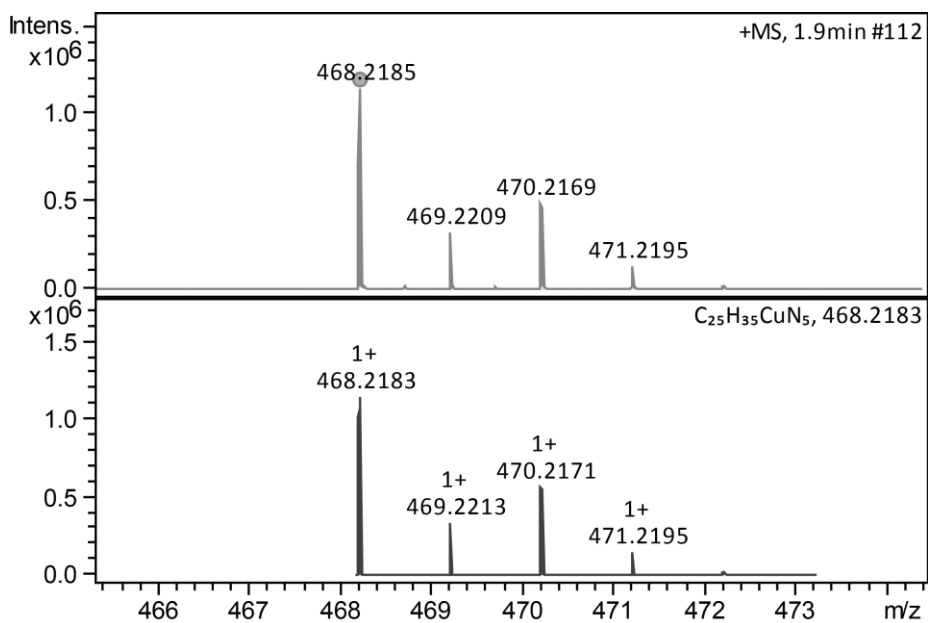

Figure S22: ESI-MS spectrum of 3.

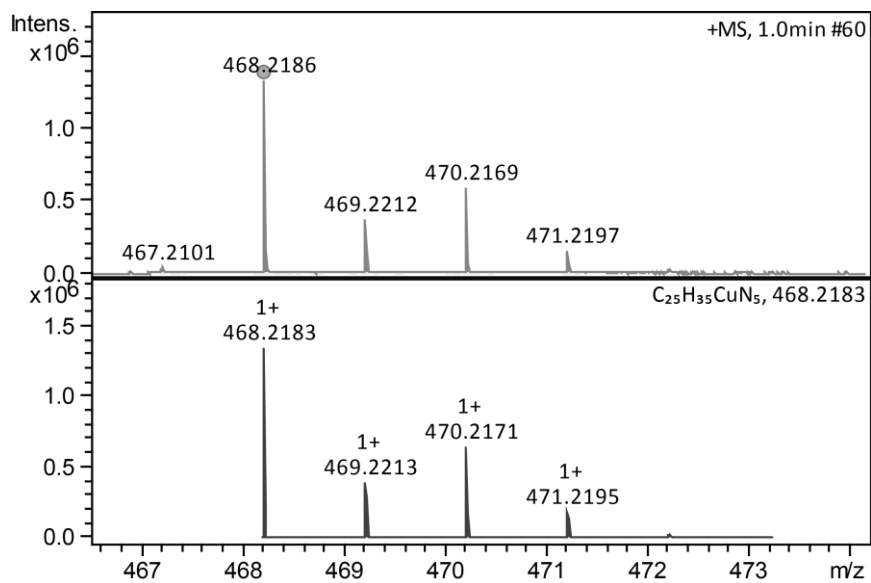

Figure S23: ESI-MS spectrum of 4.

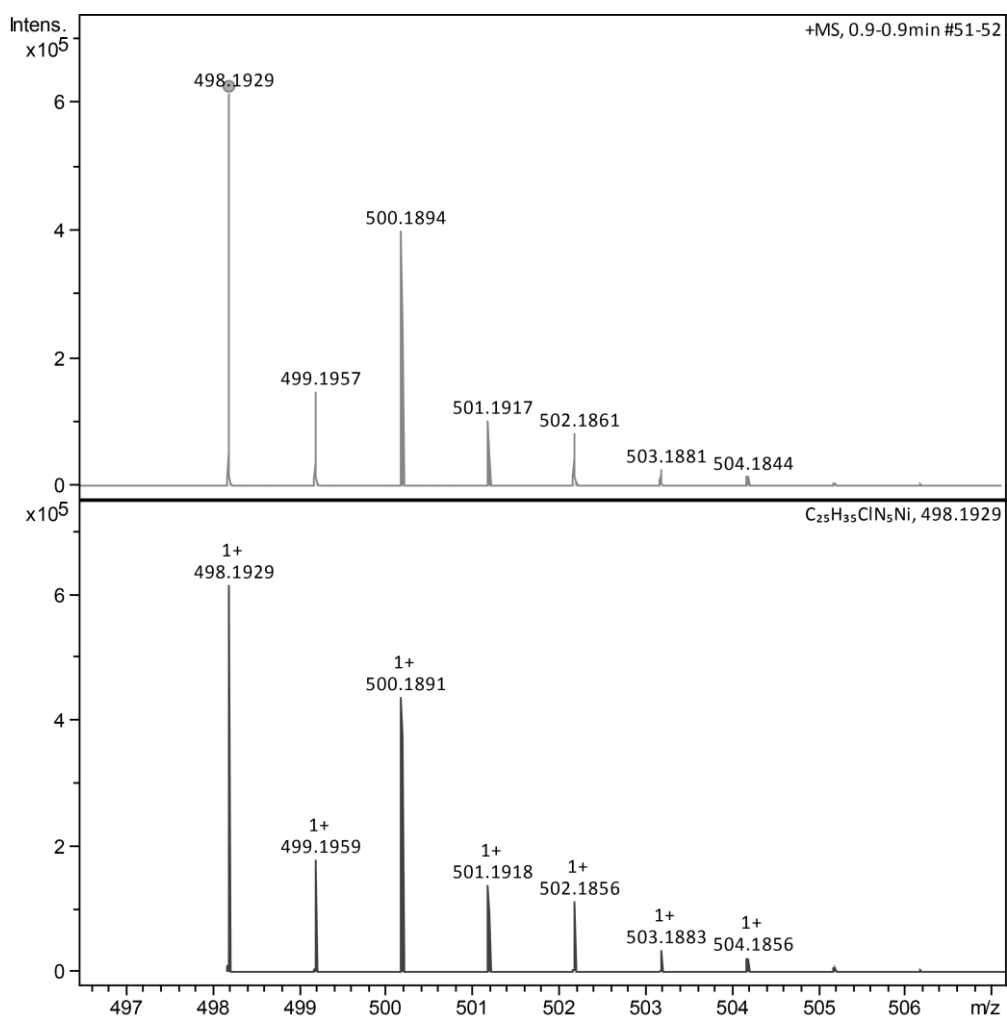

Figure S24: ESI-MS spectrum of 7.
